# Supplementary material for: Pleural Effusions on MRI in Autosomal Dominant Polycystic Kidney Disease
Source: MDPI journal article supplement (doi:10.3390/jcm12010386), 2023-01-03
Supplement: s1 [file s1]

## Supplemental Tables

**Supplemental Table S1.** Demographic and laboratory data in 110 ADPKD subjects, with and without pleural fluid. Normal distributed continuous variables are given as mean + standard deviation. Non-normal distributed continuous variables are given as mean (first quartile value - third quartile value). Ordinal variables are shown as number followed by the percentage.

| Demographic Data                                                     | No Pleural Fluid<br>N=82 | Pleural Fluid<br>N=28 | p-value      |
|----------------------------------------------------------------------|--------------------------|-----------------------|--------------|
| Age                                                                  | 45±15                    | 40±14                 | 0.15         |
| Male: Female (% Male)                                                | 44:38 (54%)              | 8:20 (29%)            | <b>0.02*</b> |
| <i>Race</i>                                                          |                          |                       |              |
| White                                                                | 72 (87%)                 | 20 (71%)              | <b>0.01*</b> |
| Black                                                                | 3 (4%)                   | 3 (11%)               |              |
| Asian                                                                | 4 (5%)                   | 3 (11%)               |              |
| Unknown                                                              | 3 (4%)                   | 2 (7%)                |              |
| Weight (kg)                                                          | 77 (62-88)               | 72 (57-81)            | 0.14         |
| Body Mass Index (kg/m <sup>2</sup> )                                 | 26 (22 – 28)             | 25 (21–27)            | 0.54         |
| Body Surface Area (m <sup>2</sup> )                                  | 1.9 (1.7-2.1)            | 1.8 (1.6-2.0)         | 0.08         |
| Systolic Blood Pressure (mmHg)                                       | 122 ± 14                 | 122 (110-128)         | 0.95         |
| Diastolic Blood Pressure (mmHg)                                      | 78 (71-84)               | 77 (72-82)            | 0.79         |
| Estimated Glomerular Filtration<br>Rate (ml/min/1.73m <sup>2</sup> ) | 88 (67–109)              | 93 (81–118)           | 0.45         |
| Blood Urea Nitrogen (mg/dl)                                          | 19 (14 – 21)             | 17 (12–20)            | 0.22         |
| Albumin (g/dl)                                                       | 4.4 (4.2 – 4.6)          | 4.3 (4.2–4.4)         | 0.12         |
| Aspartate Transaminase (U/L)                                         | 27 (22 – 29)             | 23 (17–27)            | 0.10         |
| Alanine Transaminase (U/L)                                           | 27 (17 – 29)             | 21 (15–24)            | 0.10         |
| Total Kidney Volume /height<br>(ml/m)                                | 702 (333 – 959)          | 719 (391–920)         | 0.58         |
| Liver Volume (mL)                                                    | 1984 (1442–2113)         | 1943 (1358–2044)      | 0.84         |
| Spleen Volume (mL)                                                   | 255 (170 – 300)          | 264 (207–308)         | 0.70         |
| <i>Genotype Data</i>                                                 |                          |                       |              |
| Data Available                                                       | 66 (80%)                 | 25 (93%)              | 0.29         |
| PKD1 Mutations                                                       | 49 (74%)                 | 19 (76%)              | 0.86         |
| PKD 2 Mutation                                                       | 17 (26%)                 | 6 (24%)               | 0.86         |

\* significant statistic difference exists ( $p < 0.05$ ).
